# Supplementary material for: k-dominant Skyline query algorithm for dynamic datasets
Source: Springer Nature journal article supplement (doi:10.1007/s11704-020-9246-2), 2020-09-29
Supplement: 11704_2020_9246_MOESM1_ESM.pdf [file 11704_2020_9246_MOESM1_ESM.pdf]

# *k*-dominant Skyline query algorithm for dynamic datasets

Zhiyun ZHENG , Ke RUAN, Mengyao YU, Xingjin  
ZHANG, Ning WANG, Dun LI

Frontiers of Computer Science, DOI: [10.1007/s11704-020-9246-2](https://doi.org/10.1007/s11704-020-9246-2)

# Problems & Ideas

- Most k-dominant Skyline query algorithms are oriented to static datasets
- We propose a k-dominant Skyline query algorithm for dynamic datasets.
  - 1 First, we compute the dominant ability of each object and sort objects in descending order by dominant ability.
  - 2 Then, we maintain an inverted index of the dominant index by k-dominant Skyline point calculation algorithm.
  - 3 The k-dominant Skyline point of the new data set is obtained by inserting and deleting algorithm.

# Main Contributions

- The query algorithm can effectively improve query efficiency.

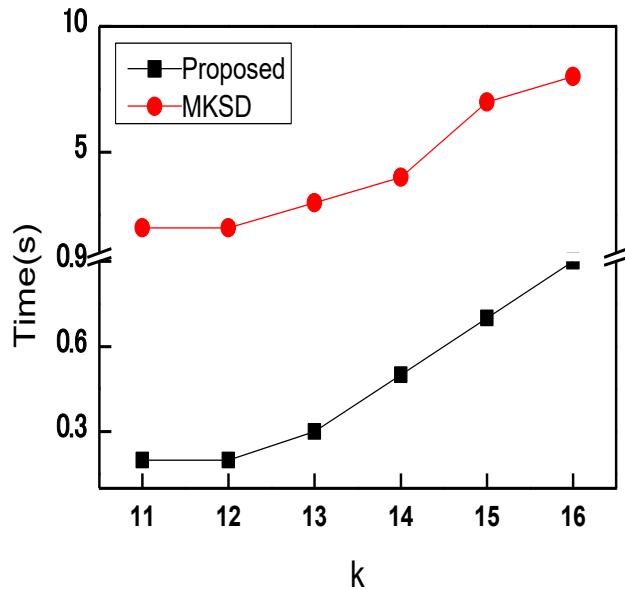

Experimental results of NBA data set
